# Supplementary material for: The RAB27A effector SYTL5 regulates mitophagy and mitochondrial metabolism
Source: eLife journal article supplement (doi:10.7554/elife.105541), 2025-02-17
Supplement: fig1-data3 [file Figure 1F-Source Data 9.pdf › Figure 1-Source Data 3/Figure 1F-Source Data 9.pdf]

Figure 1F

PIP strip : Full-length

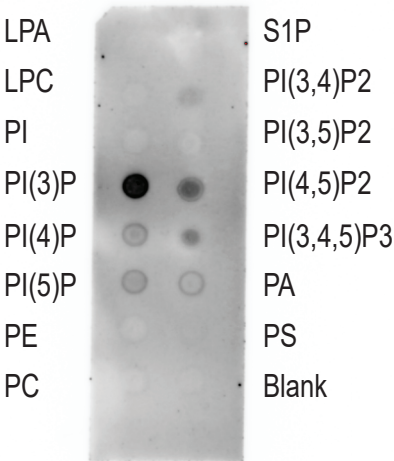

Figure 1F

PIP strip : ΔSHD

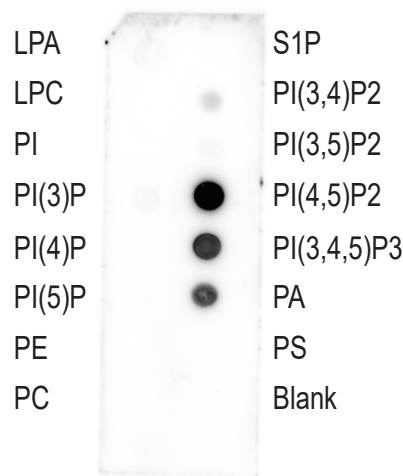

Figure 1F

PIP strip : ΔC2AB

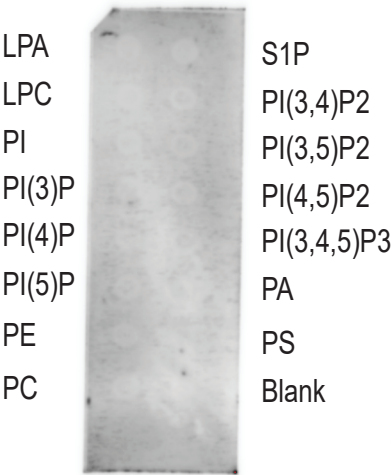

Figure 1F

PIP strip : Control



|        |             |
|--------|-------------|
| LPA    | S1P         |
| LPC    | PI(3,4)P2   |
| PI     | PI(3,5)P2   |
| PI(3)P | PI(4,5)P2   |
| PI(4)P | PI(3,4,5)P3 |
| PI(5)P | PA          |
| PE     | PS          |
| PC     | Blank       |

Figure 1F

Lipid membrane strip : Full-length

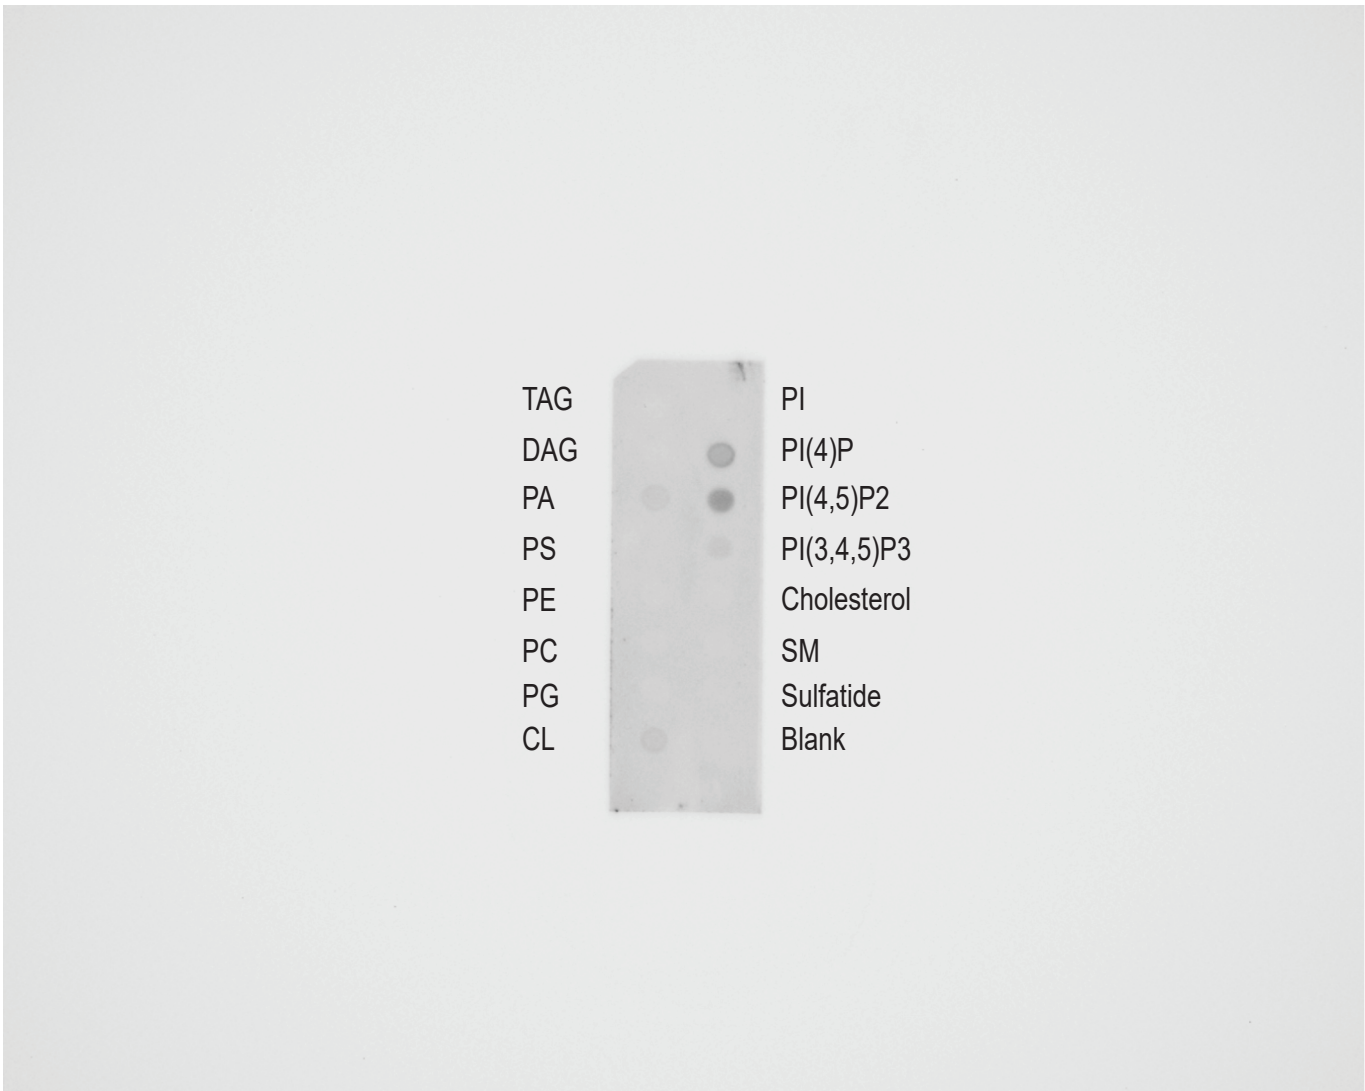

Figure 1F

Lipid membrane strip : ΔSHD

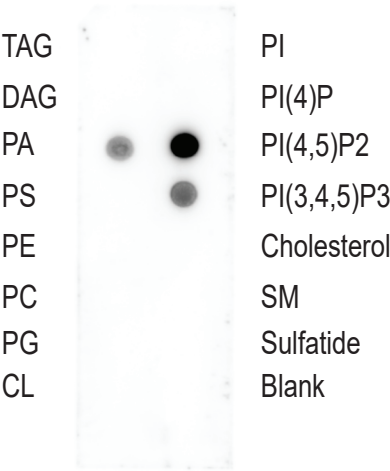

Figure 1F

Lipid membrane strip : ΔC2AB

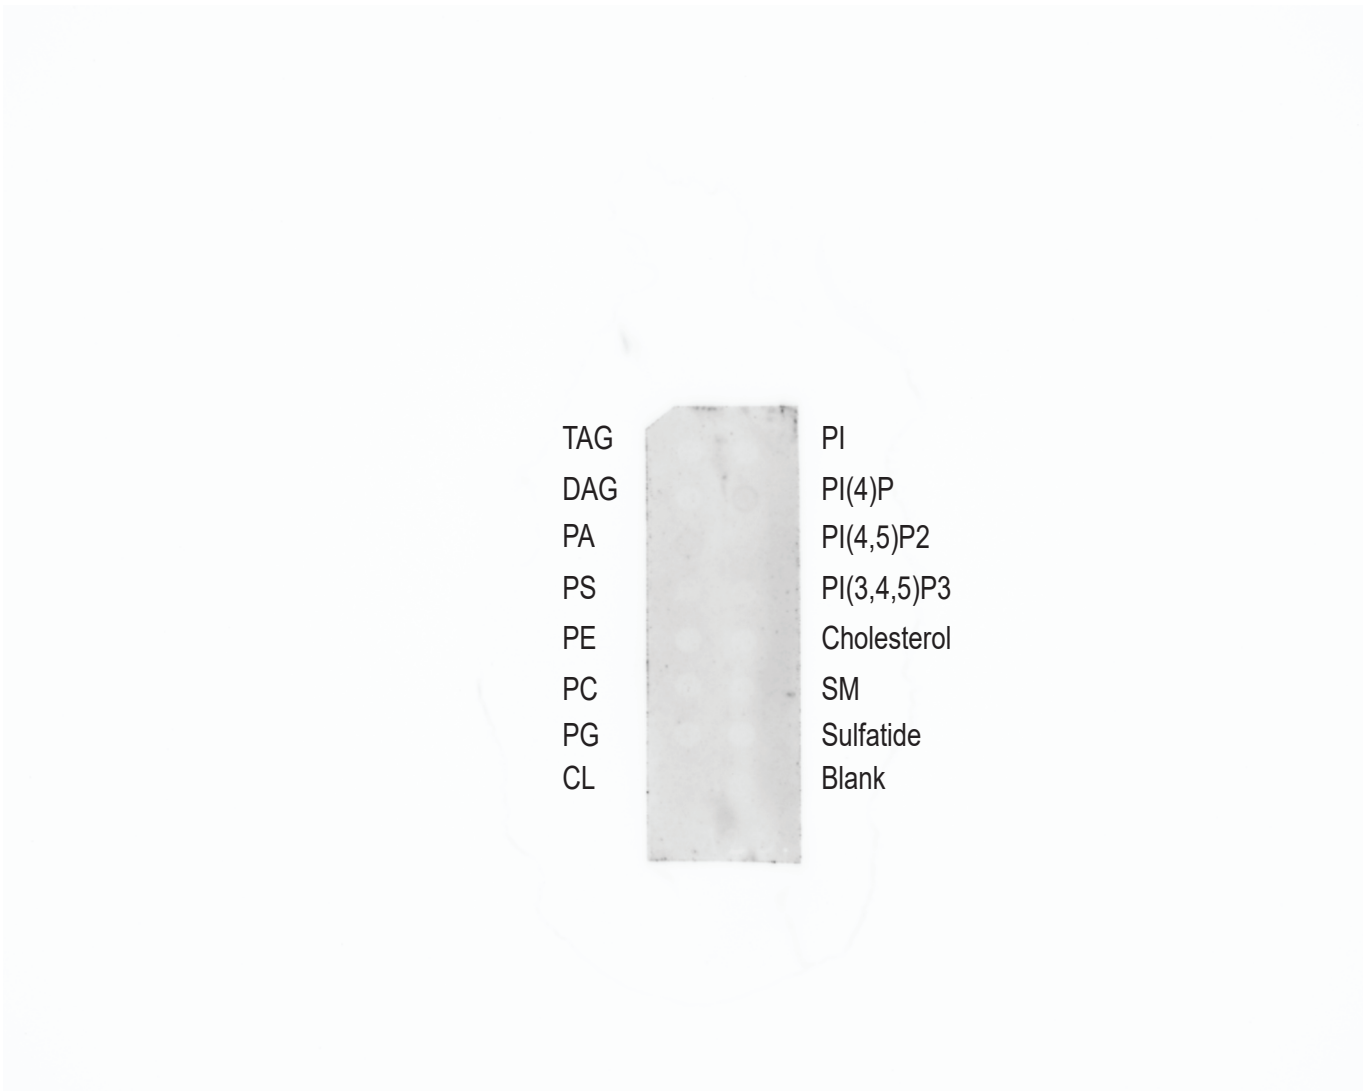

Figure 1F

Lipid membrane strip : Control



|     |             |
|-----|-------------|
| TAG | PI          |
| DAG | PI(4)P      |
| PA  | PI(4,5)P2   |
| PS  | PI(3,4,5)P3 |
| PE  | Cholesterol |
| PC  | SM          |
| PG  | Sulfatide   |
| CL  | Blank       |
