# Supplementary material for: The RAB27A effector SYTL5 regulates mitophagy and mitochondrial metabolism
Source: eLife. 2025 Nov 26;14:RP105541. doi: 10.7554/eLife.105541 (PMC12656530; doi:10.7554/eLife.105541)
Supplement: Figure 4—figure supplement 2—source data 3. [file elife-105541-fig4-figsupp2-data3.xlsx]

## Sheet: Figure 4 – figure supplement 2A
	Control	Control	Control	DFP	DFP	DFP	DMOG	DMOG	DMOG
siControl	1	1	1	8.11456	4.97771	12.0166	12.7083	5.75355	21.0258
siSYTL5	1.18319	1.2089	2.55666	10.21	9.22162	17.311	11.1384	9.38356	20.4471
siRAB27A	4.45296	0.956578	1.71822	8.33563	5.34399	8.07147	10.3362	9.75827	4.83837
siSYTL5 + siRAB27A	1.39073	1.05961	1.13533	12.9995	4.80411	15.4137	13.9402	5.96793	4.27628

## Sheet: Figure 4 – figure supplement 2B
		SYTL5 KD	SYTL5 KD	SYTL5 KD
siControl		1	1	1
siSYTL5 #1		0.111036	0.130136	0.110895
siSYTL5 #2		0.18	0.11	0.12

## Sheet: Figure 4 – figure supplement 2C
	Control	Control	Control	DFP	DFP	DFP	DFP + BafA1	DFP + BafA1	DFP + BafA1
siControl	1	1	1	11.0397	5.10846	9.0697	1.52163	0.876962	1.23521
siSYTL5 #1	1.20293	0.731063	1.39723	10.6389	4.58354	8.30409	1.51328	0.793876	1.342
siSYTL5 #2	1.08552	0.89616	1.36126	12.5719	5.89782	9.6102	1.57332	1.02174	1.41063

## Sheet: Figure 4 – figure supplement 2D
	Control	Control	Control	CCCP	CCCP	CCCP	CCCP + BafA1	CCCP + BafA1	CCCP + BafA1
siControl	1	1	1	9.55	11.96	24.2873	0.37	0.64	0.874821
siSYTL5 #1	0.59	0.62	0.758559	15.36	17.21	27.1023	0.22	0.45	0.632244
siSYTL5 #2	6.1	1.04	1.46848	15.95	24.16	35.3793	0.83	0.92	1.61553

## Sheet: Figure 4 – figure supplement 2E
	control	control	control	DFP	DFP	DFP	DFP + BafA1	DFP + BafA1	DFP + BafA1
siControl	1	1	1	5.05078	10.531	8.84777	1.36231	2.78902	2.00825
siRAB27A #1	1.32905	0.471926	0.383837	4.27609	4.63752	3.20134	1.29243	1.67783	1.00488
siRAB27A #2	2.33285	1.07275	0.941368	10.2858	21.5454	13.0861	1.42317	2.79263	1.93269

## Sheet: Figure 4 – figure supplement 2F
	LC3 II	LC3 II	LC3 II
Control	1	1	1
Starv	2.47017	2.10363	1.95247
BafA1	10.2635	7.66732	7.33434
Starv/BafA1	18.1917	10.094	10.8034
SYTL5 KO Control	1.00549	1.29371	1.39416
SYTL5 KO Starv	0.63767	1.81795	2.63375
SYTL5 KO BafA1	8.70914	6.04405	6.93448
SYTL5 KO Starv/BafA1	9.6586	10.0341	10.2243
