# Supplementary material for: The RAB27A effector SYTL5 regulates mitophagy and mitochondrial metabolism
Source: eLife. 2025 Nov 26;14:RP105541. doi: 10.7554/eLife.105541 (PMC12656530; doi:10.7554/eLife.105541)
Supplement: Figure 5—source data 3. [file elife-105541-fig5-data3.xlsx]

## Sheet: Figure 5B
	Basal respiration	Basal respiration	Basal respiration	ATP production	ATP production	ATP production
Control	12.06	10.63	13.56	10.76	6.92	10.92
RAB27A KO	7.74	6.47	9.43	6.81	4.22	7.04
SYTL5 KO	4.8	7.25	7.7	4.54	4.54	5.17
RAB27A/SYTL5 dKO	6.83	7.82	8.63	5.68	5.49	6.23

## Sheet: Figure 5D
	Glycolysis	Glycolysis	Glycolysis
Control	1.12	1.54	1.27
RAB27A KO	0.84	0.8	1.1
SYTL5 KO	2.27	1.86	1.76
RAB27A/SYTL5 dKO	0.98	0.99	0.97

## Sheet: Figure 5F
	CV-ATP5A	CV-ATP5A	CV-ATP5A	CV-ATP5A	CIII-UQCRC2	CIII-UQCRC2	CIII-UQCRC2	CIII-UQCRC2	CIV-MTCO1	CIV-MTCO1	CIV-MTCO1	CIV-MTCO1	CII-SDHB	CII-SDHB	CII-SDHB	CII-SDHB
Control	1	1	1	1	1	1	1	1	1	1	1	1	1	1	1	1
RAB27A KO	1.00776	1.02	1.17161	1.08959	1.06559	1.03	1.14	1.08	1.21112	0.97	1.22	1.65	1.19928	0.83	0.95	0.75
SYTL5 KO	1.14819	0.91	1.2952	1.17693	0.734244	0.66	0.91	0.84	0.916264	0.68	0.84	1.37	1.06509	1.24	1.26	0.87
RAB27A/SYTL5 dKO	0.869436	1.03	1.44536	1.07341	0.913544	0.91	1.3	1.04	1.74308	1.12	1.68	1.49	1.01465	0.98	1.25	0.3

## Sheet: Figure 5G
	Control	Control	Control	DFP	DFP	DFP	DMOG	DMOG	DMOG
siControl	1	1	1	0.832803	0.252912	0.59707	0.946477	0.359863	0.522299
siSYTL5	1.18078	1.00356	2.58007	0.930721	0.428628	0.739356	0.849481	0.558155	0.835643
siRAB27A	1.16927	0.707896	1.40085	1.00909	0.45974	0.974071	0.73397	0.703865	0.873245
siSYTL5 + siRAB27A	1.26418	0.880405	1.54149	1.42847	0.446578	0.818774	1.03817	0.945436	0.932018
