# Supplementary material for: The RAB27A effector SYTL5 regulates mitophagy and mitochondrial metabolism
Source: eLife. 2025 Nov 26;14:RP105541. doi: 10.7554/eLife.105541 (PMC12656530; doi:10.7554/eLife.105541)
Supplement: Figure 6—figure supplement 1—source data 1. [file elife-105541-fig6-figsupp1-data1.xlsx]

## Sheet: Figure 6 – figure supplement 1
	siControl	siControl	siControl	siControl	siSYTL5 #1	siSYTL5 #1	siSYTL5 #1	siSYTL5 #1	siSYTL5 #2	siSYTL5 #2	siSYTL5 #2	siSYTL5 #2	siSYTL5 #3	siSYTL5 #3	siSYTL5 #3	siSYTL5 #3	siRAB27A #1	siRAB27A #1	siRAB27A #1	siRAB27A #1	siRAB27A #2	siRAB27A #2	siRAB27A #2	siRAB27A #2
	1	1	1	1	0.973205	1.06064	0.64111	1.15749	1.05586	0.626225	0.501887	1.30793	0.996866	0.626225	0.562596	0.958404	0.987406	0.748853	0.738747	1.09994	0.981699	1.12604	0.915212	1.38613
