# Supplementary material for: The RAB27A effector SYTL5 regulates mitophagy and mitochondrial metabolism
Source: eLife. 2025 Nov 26;14:RP105541. doi: 10.7554/eLife.105541 (PMC12656530; doi:10.7554/eLife.105541)
Supplement: Figure 6—source data 1. [file elife-105541-fig6-data1.xlsx]

## Sheet: Figure 6A
Brain - Nucleus Accumbens	Brain - Hypothalamus	Adrenal Gland	Brain - Amygdala	Brain - Caudate	Brain - Hippocampus	Cervix - Endocervix	Brain - Putamen	Brain - Anterior Cingulate Cortex	Esophagus - Mucosa
4.48929	5.27798	3.8166	3.55704	4.58856	4.70819	3.29866	3.37128	2.42358	2.26694
3.72574	5.64875	3.27917	2.79971	3.05797	4.70929	4.83188	1.9501	2.64893	2.76384
4.35262	0.546759	2.52306	4.48091	4.41549	2.93979	2.19314	3.70377	2.78889	2.55729
2.46022	4.20242	4.45418	3.3886	4.19219	3.7761	2.42062	3.39561	2.37072	2.0054
4.88509	1.01578	3.84298	4.50589	3.22651	2.77252	4.1811	3.46467	2.35361	3.14388
4.21568	3.50843	2.32797	3.40259	4.24565	1.42169	1.69153	3.98277	1.41522	1.29748
4.86592	4.02768	3.43122	2.88518	4.41954	1.94972	2.04474	2.66221	1.68437	2.08202
3.62059	4.56499	4.42089	4.16269	3.46336	4.20633	5.61559	3.45628	1.73162	2.69844
3.02662	4.14812	2.94186	2.19818	3.83188	2.60597	0.298658	4.06523	1.33342	0.928427
4.27202	4.09255	2.93678	4.40054	2.26873	4.10518	3.92315	3.25172	2.584	1.83026
3.69377	2.04963	3.48414	1.97049	4.52168	2.21319		3.73552	2.30597	2.95271
4.07724	2.55139	4.16108	2.14339	3.49057	3.10283		3.71149	2.82944	2.50589
2.7366	2.08814	4.56194	2.14861	4.09001	3.01935		1.05311	2.53978	2.68415
2.31034	3.44798	3.16928	3.46858	3.0009	4.18349		1.87578	0.639047	1.21971
1.39944	1.64339	5.86146	3.56316	0.602742	1.95754		4.45943	3.51475	2.59956
4.43095	2.46806	4.33128	4.80735	1.88166	1.55238		3.08882	2.5208	3.34653
3.48929	3.30524	4.41616	3.16382	1.87617	2.1306		0.668936	3.00594	3.26858
3.72137	5.24031	1.68572	3.35078	4.67694	4.57228		2.53804	3.07878	1.85917
3.60407	2.98477	3.29116	3.39534	3.46074	2.0545		4.38957	3.4526	2.27232
3.8125	4.28244	2.93036	2.93716	3.87184	2.53953		2.5634	3.11353	2.96162
3.74201	3.46858	3.88947	1.42008	3.06557	4.05137		2.18935	1.57434	2.65099
2.13947	2.10869	3.3703	3.9364	4.03738	3.48156		2.94054	3.81455	3.23358
4.41007	2.44255	4.1152	4.23113	2.1944	4.79546		4.17473	2.18618	2.45075
4.39232	4.62059	4.12763	4.0027	2.84439	3.81455		2.98021	1.58688	1.42277
3.84699	2.99982	1.60407	3.51728	4.69822	2.4844		3.18126	2.54077	2.07279
3.67243	3.88264	2.41116	3.02077	3.54473	3.20789		4.08831	2.88479	2.66993
5.08619	3.81044	3.58856	2.81578	1.12895	1.36681		4.86245	2.36709	2.26903
5.14527	4.10182	3.42828	2.64916	5.06867	5.23228		2.51197	1.23327	1.81926
0.525768	4.08831	4.26303	2.82477	5.20438	2.05866		0.278104	2.07758	2.77463
4.36737	3.55459	3.27888	2.99892	3.86987	3.50462		4.33771	2.90516	1.87499
4.63807	5.01212	3.95606	4.47508	4.77558	1.17377		0.730314	2.47145	1.42331
0.359521	3.51854	3.80219	4.2211	0.542209	3.88069		1.24671	3.03069	1.66084
4.38888	4.33485	3.09761	3.15721	1.39506	2.96956		3.05502	2.21101	2.15056
4.01257	4.52419	3.68706	2.15153	3.87774	4.04002		0.924556	2.52231	2.61023
2.47612	5.16672	4.99367	4.43162	0.371057	4.78503		3.44705	3.01203	3.02786
4.44626	4.40054	3.71809	4.7021	0.711583	4.39849		3.26559	2.50309	1.49927
4.13175	3.70266	3.49697	5.50494	1.75446	5.50748		3.06229	2.47249	2.96421
4.23955	3.49697	4.59036	4.31832	3.41495	2.24762		3.6241	2.04649	1.49057
4.20867	3.74524	4.29866	4.13093	4.19535	4.55827		1.09424	1.75104	3.08933
1.04614	4.24031	4.32193	4.2854	1.09559	1.71149		1.0895	1.89801	3.488
2.94561	4.03826	4.61941	2.56267	3.38667	2.8088		3.42506	1.02645	0.331705
2.00108	4.74631	3.04632	3.82985	3.61941	3.59694		1.51501	2.55361	1.63227
4.71918	3.7137	3.28066	3.04404	3.9982	4.78136		2.75467	2.92809	0.809744
3.85798	3.01382	2.85559	4.765	4.63517	5.58256		2.84398	3.11836	1.56755
3.90207	5.25965	3.78136	1.94897	3.1635	1.44784		4.04963	0.81106	2.87184
3.98277	3.76341	2.46676	4.10852	1.93093	4.06005		2.02963	2.56438	3.59932
3.82883	2.95364	3.91361	4.05224	4.12184	2.65992		0.349139	2.02432	2.68527
4.44824	3.37587	2.46545	5.6605	3.05155	2.7392		1.69153	3.01828	2.3051
3.00144	4.20867	3.50208	4.49185	3.23511	3.50208		3.76553	2.60786	1.42653
3.926	3.14845	2.66835	3.72683	0.578021	3.02237		1.22219	3.71918	3.28688
4.6865	4.84097	2.35332	4.84449	3.72574	3.852		1.9982	2.42707	2.28865
3.32524	3.79286	4.30743	2.99023	4.69488	2.71677		0.776778	1.13356	2.21692
5.44791	4.51665	3.7845	1.89064	2.71984	3.42156		4.29057	2.66948	2.31846
2.37879	3.30247	4.68257	3.61353	2.21412	4.05832		2.27262	3.04719	2.43136
0.709555	3.58856	2.91016	2.29748	3.76447	2.30159		3.88557	2.36261	2.23481
1.67084	4.26903	3.59813	3.70598	3.34894	4.43896		3.09018	2.05797	2.19849
3.76447	4.82426	3.39451	3.34682	4.35966	3.42062		3.62176	2.82823	1.99783
5.20672	3.0597	3.76765	5.71315	3.38847	4.68818		2.69153	1.03069	2.2969
3.2496	3.32539	3.24702	3.20398	2.94804	1.91877		1.58352	1.73162	2.45996
3.3274	4.23496	3.6017	4.16672	0.686433	4.84097		1.77653	3.23557	2.00827
4.54473	1.29983	1.81435	5.53605	1.44414	1.86354		0.510456	3.24595	2.31208
5.30488	3.51979	1.89259	4.63459	1.5955	3.1606		4.33842	1.66903	2.56755
4.73118	2.0844	4.43029	4.28614	3.72792	3.11736		1.79452	2.00396	3.66334
4.59515	2.54275	3.78031	3.29219	3.38709	4.21568		4.54844	2.60146	3.25897
3.15979	3.22466	1.99349	3.87676	2.18523	1.75189		2.06867	3.67243	2.79639
4.25399	4.34979	2.90439	2.90593	4.2032	3.83086		3.97361	4.60229	1.32941
3.61471	3.50462	3.78346	4.16189	4.58316	2.38654		2.59431	3.14454	1.02645
5.14649	3.96717	5.12928	2.60075	3.41684	4.49313		2.23205	3.95513	2.30012
3.14731	3.43256	4.75969	0.997473	4.55336	3.28481		1.42546	0.971884	2.24184
5.0492	0	3.9279	4.04876	3.55213	1.03633		4.48091	2.1306	2.45022
2.29514	4.21878	4.13832	2.77526	1.21971	1.28392		1.36401	2.54325	0.286526
0.98972	4.29793	4.18824	0.74528	1.24489	2.44334		2.82944	2.99729	1.49416
3.07073	3.31586	2.39479	4.33414	2.02609	1.88714		0.223546	1.98039	2.91188
3.96809	4.30451	5.52482	2.71105	4.45878	5.43463		2.51046	3.34852	2.02255
4.66562	3.95791	3.65764	4.07468	0.675003	2.78325		3.04334	2.96477	3.3238
3.70819	4.34625	3.37948	2.9703	5.02192	4.80839		4.35685	2.681	1.58496
4.50906	2.07313	4.51728	2.61164	0.271426	2.25822		4.72901	2.71677	3.47119
5.29719	4.40939	4.76871	2.20945	0.905274	3.08134		1.86394	3.45391	3.0054
4.81916	3.40953	3.72792	3.11587	4.45878	3.19014		1.80529	1.38405	3.42465
4.31397	3.92695	2.1884	4.5735	2.47794	3.29455		2.68257	3.06454	1.54942
4.29205	4.13668	4.48156	2.92505	4.35544	1.2394		3.72683	1.18142	3.24275
4.33628	1.97159	3.17025	3.76553	2.76511	4.37504		0.649569	3.51223	1.68077
5.04177	5.41752	4.88264	5.34021	3.88947	3.47768		3.94953	3.45115	2.66426
3.20289	4.15056	3.3781	3.10131	3.1903	2.98623		4.8802	1.22712	1.05033
0.65764	5.02901	3.12879	2.17983	3.04527	1.76553		3.03228	2.52957	2.49185
5.1823	3.20304	4.70874	3.31441	2.55287	3.27307		3.13455	2.64016	1.35332
4.904	5.22728	4.49697	3.87774	3.42412	1.9542		0.83996	1.53556	2.12035
4.0321	3.84197	2.93697	4.00809	4.53294	4.21179		2.70377	2.84238	2.72661
5.51096	4.38128	2.18015	3.00791	3.44692	2.78262		2.17281	3.00988	2.78513
4.20242	3.03333	3.27172	2.39479	1.07998	2.60644		0.950095	3.55459	1.37239
4.05224	4.56316	3.19093	5.13052	3.46205	4.31542		0.508733	3.16253	3.0358
1.99386	2.45707	4.08576	2.98732	5.10685	3.28096		0.310689	2.29278	2.77547
5.22072	4.66448	1.69153	3.61824	2.8508	0.757279		1.11503	2.8266	2.4117
2.33885	2.12598	4.33628	2.99964	5.08874	3.20992		1.92865	2.53953	2.69086
4.38957	3.21008	3.54967	5.16832	3.70044	1.19661		1.5435	2.82089	1.92372
1.15704	4.48607	4.51602	5.24527	4.35262	3.95884		3.69042	2.15348	2.23235
5.79779	3.66789	4.46597	1.68661	3.9982	4.06781		0.210888	1.82416	2.07656
0.685985	3.06471	4.04789	2.23542	5.34908	3.56071		4.18824	0.632082	3.00522
4.32337	4.53978	4.16672	3.37295	2.70244	4.66334		3.81558	3.36723	1.92562
2.91915	4.96578	3.04404	3.67129	5.26003	2.78848		2.17568	1.31615	3.54102
4.14241	5.07296	4.51286	4.69711	0.855591	5.43729		4.56071	1.88323	1.66221
4.41954	3.47638	2.32998	2.68347	5.67356	3.08423		3.20586	2.33371	1.77062
3.63691	2.01899	2.89879	4.52982	1.37962	2.76702		0.324926	2.66471	2.41684
3.04054	3.35924	1.05311	1.82701	3.35106	3.8953		3.78869	1.45365	1.74201
4.31397	3.91361	2.6792	2.63413	1.13947	2.10635		3.11453	2.45969	3.74308
3.56682	2.12862	4.32841	3.75809	3.54597	3.40749		0.592062	2.92505	2.2549
5.15664	3.50716	5.16108	2.77968	2.46258	1.34142		1.0697	3.02272	1.15381
2.96292	3.46858	4.42492	3.58256	1.74502	5.63836		0.141171	2.38984	3.57289
3.9241	3.42573	3.98641	5.96417	3.37518	4.06953		0.168514	2.64085	3.2345
4.6427	4.66107	3.70155	1.9594	0.743386	2.618		2.17217	3.51223	3.11603
1.01721	3.17009	3.32697	1.90034	0.866631	2.9428		4.1914	2.99729	2.04928
4.56682	4.88947	3.32452	1.18713	4.7252	3.32222		0.269273	2.37407	3.79077
4.53792	4.54411	3.80839	2.60573	1.42169	1.95271		0.723078	2.17409	2.64501
4.24108	3.11919	1.97856	3.09051	4.37782	3.71809		2.6828	3.081	1.87066
5.21257	4.12763	3.7761	4.96301	1.26063	1.30451		1.07451	2.4019	1.47041
4.86493	4.86493	3.63575	3.23603	5.30488	2.22404		0.847275	1.38571	2.73053
3.24884	2.76977	1.55778	6.08874	4.9331	5.3875		0.349931	2.99585	2.74911
2.05832	4.2765	4.29205	2.62667	3.52482	3.58015		3.90881	0.599794	2.34426
3.95884	3.0213	2.36877	3.0063	4.54102	5.24869		0.202512	3.03492	1.70797
4.26379	4.11603	2.30422	6.51223	3.30144	4.66164		2.41332	1.40654	1.51147
4.33771	4.30961	3.00612	5.31107	0.665757	1.7137		1.76214	2.17313	2.1273
1.37629	4.38543	4.07724	2.35276	0.609566	1.90612		1.62947	2.8955	2.8883
3.06368	2.49083	4.09001	2.13356	4.10014	1.68392		1.10969	2.56365	3.07313
3.23787	1.98623	4.08236	2.29042	0.198243	4.52042		0.850559	0.838105	1.67491
0.295723	3.70708	2.50259	2.25187	3.5656	3.48543		1.04194	1.81352	1.90111
1.93697	4.92884	3.23925	2.01685	2.15478	1.73509		4.13011	3.23634	2.76192
3.9486	3.92315	1.55287	2.72334	1.26003	4.92884		2.95233	2.05554	2.21754
4.95373	4.52231	4.08406	4.06264	1.11836	2.72618		1.39287	2.38571	3.47379
1.21909	4.39094	3.40885	3.89724	0.253384	4.84046		1.78994	2.83005	2.66744
1.66448	2.83754	2.6457	2.89278	2.11969	1.30918		1.9092	3.09424	2.54251
3.774	2.79535	3.82273	3.75061	5.41177	4.69098		2.14568	2.2549	2.17409
4.41143	4.74201	5.59902	2.83228	0.264476	6.18269		3.93452	2.76129	3.25731
4.06178	3.8125	2.60312	4.23189	4.55213	3.50589		1.419	2.08338	2.10869
4.43429	2.39012	4.0365	3.47119	2.47197	1.75873		2.62924	2.30012	2.03351
4.59096	4.30597	2.00971	4.5656	1.29866	3.06454		3.4117	3.70708	2.19755
2.02645	4.1819	3.26784	4.80219	2.51627	2.62387		0.194844	2.6722	3.24975
4.48607	2.14666	2.02892	4.26078	5.13381	4.26604		0.505383	3.13881	2.17792
4.50906	6.0036	4.30086	3.73552	4.29719	2.95587		4.19456	0.766807	1.67536
2.46022	4.14893	2.95494	4.56071	1.57386	3.32308		1.49927	3.08814	1.76256
3.51602	3.50589	3.80116	2.15186	3.38405	5.22882		2.92865	2.4163	2.67582
3.67129	3.41967	3.66448	3.9222	4.64501	2.82904		4.22419	3.75489	2.46048
3.70598	3.15186	2.46048	3.22774	1.9222	2.60502		2.85937	3.16511	2.59526
3.33685	4.96993	3.10635	0.345169	3.85599	4.27575		4.78293	1.81352	0.932515
4.80116	4.01257	1.07313	4.17153	2.86631	2.90574		1.61306	2.70841	1.33228
2.57846	5.22612	1.71238	3.45444	1.96273	3.89724		3.16205	1.00791	1.74846
5.79597	5.63894	4.14568	2.62152	4.00899	2.36093		0.836813	2.22373	1.53953
4.40599	4.04002	3.0027	3.09862	1.56657	5.30925		2.03949	2.77273	1.48388
3.80116	4.32048	5.00944	3.42854	5.16832	1.91342		4.13093	4.29572	2.67627
4.92172	3.8268	3.14486	3.55336	0.456806	2.28422		3.99095	1.8504	2.81762
2.24306	3.46467	3.92695	3.53854	4.25852	3.78346		4.19771	3.35727	2.17505
4.74416	3.15283	3.45825	1.33743	4.07039	3.03069		3.1035	2.98841	2.02892
4.56255	4.65535	3.12664	3.75596	3.2814	4.40871		0.263515	2.5634	1.56949
4.70432	4.17073	3.91552		2.39753	3.40885		2.2135	2.92296	2.22311
1.7566	2.66653	2.26754		3.79909	2.28333		3.87381	3.31542	2.54003
4.05658	4.749	2.31412		4.88753	2.30305		3.49185	3.64155	2.5568
3.56194	5.23955	3.21117		2.33857	5.52325		2.65145	3.08882	2.76702
0.380729	2.31991	3.1811		1.36681	1.8335		2.66403	3.65421	1.79784
2.09694	4.5435	4.5435		4.10936	3.48671		2.54077	2.55876	2.33657
5.29902	2.37295	2.71655		3.82883	3.0697		4.16993	3.37629	2.63343
4.1152	4.80426	3.92884		2.76065	1.32481		1.84398	1.51652	3.44969
3.6893	2.66539	3.3835		5.13463	2.50513		0.423202	2.64432	1.18587
1.32654	3.79077	2.42277		1.67717	1.73118		3.72028	1.56169	2.92372
1.40762	4.74093	4.6311		4.1152	1.90111		0.609093	2.68257	2.69354
3.85699	4.77241	3.1152		0.982072	1.98732		3.21785	3.38156	2.38819
4.10266	1.74932	4.84097		4.1643	5.33842		3.46205	1.92486	2.52882
5.53947	2.05762	0.786596		4	5.89869		0.222186	3.06488	4
3.67582	4.38198	2.96421		3.91361	1.79618		3.07587	2.13586	2.40436
3.72683	4.26679	4.95466		1.8168	5.49313		3.48156	2.39561	1.89724
4.14975	4.11187	3.84097		0.631058	4.35755		1.5864	3.61941	1.71984
3.44533	5.17752	4.90737		2.1696	3.96532		0.663937	3.02645	3.31615
3.94017	4.78031	3.85499		4.38543	5.54936		1.16736	3.45141	2.53331
2.67039	3.30932	4.71094		3.14225	4.1235		2.53531	1.50437	2.04089
4.8535	5.26566	4.23266		3.0131	3.1147		2.60834	1.30276	2.41359
1.85798	4.25852	3.7939		3.80116	3.0213		3.75596	3.26213	1.3454
5.11645	4.26228	3.9486		3.56316	2.89705		5.56773	1.1551	2.31962
4.13422	4.60703	3.94392		3.93923	3.45602		2.42841	2.15088	0.793771
1.45891	3.8268	3.91743		1.89336	4.48736		4.87184		3.19204
3.68706	3.45746	3.61471		1.59789	1.51854		3.42559		2.70973
1.02715	4.30961	3.41589		4.01792	5.27947		4.15704		2.05068
2.17696	3.97361	4.04876		1.91686	4.57531		2.04299		1.976
4.08831	4.49378	3.80735		4.30743	2.61777		4.18269		2.31237
3.82883	3.6837	3.46074		3.67807	3.60644		3.90207		2.71721
3.72247	3.851	4.71425		1.66948	2.86315		5.33199		3.50716
3.07605	4.63459	4.39163		1.02361	6.93546		2.82843		1.82619
5.64212	4.23573	3.3875		1.63552	2.16285		4.14649		2.59168
1.27679	3.92029	2.68773		4.57228	1.91571		4.11187		2.66266
1.1884	4.02591	4.4489		4.47314	6.18388		1.99458		2.08712
5.62994	3.10551	4.851		0.33308	2.8492		3.35248		1.8532
2.88166	5.57077	4.73715		0.390558	2.36345		4.17632		2.61424
4.01257	1.00288	1.48336		3.9279	2.82924		0.648834		2.7801
3.90014	4.28614	4.22033		3.74739	2.1551		4.56621		3.99729
4.1177	4.36667	3.26589		4.18982	2.91743		2.10434		2.73769
3.64962	3.21117	4.1811		4.32337	2.05658		2.00684		2.01757
5.09128	3.27932	4.65363		3.34085	2.32625		2.24275		1.73118
2.38929	4.90111	3.83895		4.70543	2.14763		3.68482		2.73531
0.936742	4.27053	4.32625		4.27873	3.4268		4.8089		2.1167
4.76235	4.63865	2.10936		0.342213	1.74803		2.43376		4.18349
4.41278	2.96421	4.28244		4.20477			0.904658		2.67942
4.66562	1.76977	3.06987		4.08236			2.8984		1.10434
3.92029	3.75916	3.52982		3.03457			0.847436		2.02538
4.47703	4.26379	2.97526		3.15218			4.11603		2.52682
4.95466	3.95699	3.68257		1.55287			0.455229		2.96717
3.03457		4.6011		2.92619			0.490057		3.43069
4.63923		4.89869		2.22805			2.3846		2.52657
3.4194		4.25323		0.704075			0.920522		3.87873
2.89685		4.62585		3.77505					0.649753
4.52982		3.65764		5.18309					2.64247
3.98823		4.30232		5.08406					2.81332
5.18824		3.55459		2.57265					1.9631
5.59246		3.88655		4.57773					0.318577
2.93168		4.55704		0.47228					2.12697
4.08151		4.81147		3.26709					2.68975
3.36275		2.48929		4.69877					2.93319
0.885887		2.93678		3.86592					1.98258
4.16027		3.85499		2.94636					1.84679
4.96717		4.70321		3.73227					3.02574
4.61412		3.62761		3.25641					2.62621
5.8627		4.09001		0.902344					1.98878
4.42694		4.93263		4.78555					2.65604
4.73281		5.30998		6.08874					2.56755
4.23419		3.58015		4.20789					2.17536
5.44328		4.06091		5.10014					0.42975
4.73985		3.15348		3.89918					1.71149
5.15056		1.7433		4.56438					1.60027
4.94111		3.47897		4.70543					2.01471
1.61871		4.46728		5.04832					1.02786
3.48285		3.13849		4.27277					1.63087
4.22342		3.33314		5.14078					1.82293
0.854155		3.56803		1.71194					2.42787
4.57833		4.14975		2.34625					0.822445
5.97131		3.28007		4.14975					2.54745
4.07724		3.25716		2.92201					1.79909
4.18824		4.47962		4.09761					1.19156
4.51159		2.75425		2.60975					0.363115
3.28007		3.11337		1.68751					2.08644
4.97177		3.73769		4.01792					1.92865
3.80219		3.07912		4.83845					2.29455
4.37016		3.70377		1.73898					2.33999
2.46362		2.87499		2.80859					2.57337
3.85997		3.58856		3.78764					2.35502
2.29337		3.84197		2.01042					2.29013
2.7649		4.53169		3.82171					2.82253
1.14926		3.65421		1.3989					1.47768
1.76214		3.84197		1.50538					2.83248
4.25096		3.49185		2.44361					1.91188
3.69711		3.51854		2.17153					2.93301
		3.41251							2.49262
		4.65592							2.72247
		3.53605							2.18745
		3.47638							3.0571
		3.85997							1.98514
		2.08134							1.53953
		2.14143							2.83269
		3.66221							0.806365
		3.39273							1.5912
		3.5097							2.35276
		0.665938							2.20163
		2.85459							2.33543
									3.02627
									2.6234
									3.38681
									2.21164
									2.07108
									0.507211
									3.06039
									3.51223
									1.60265
									3.2888
									1.9486
									0.848638
									1.62012
									1.85679
									1.03422
									2.70465
									2.17153
									3.42116
									2.16124
									1.74889
									1.51854
									3.09238
									3.83188
									1.63552
									2.50157
									3.03351
									2.10869
									3.25187
									3.1235
									2.10568
									2.51425
									3.08763
									1.68975
									3.6893
									2.25429
									1.88753
									2.7405
									1.62059
									2.77083
									2.91762
									3.21195
									2.3083
									3.26784
									2.30217
									1.7995
									0.801241
									2.55606
									3.68257
									2.6173
									2.58976
									2.52155
									3.19346
									2.15186
									3.75168
									2.61659
									2.18998
									1.4844
									0.394514
									2.9279
									2.78241
									1.78283
									3.37532
									1.35727
									2.33685
									1.65718
									2.86671
									2.68885
									1.70443
									2.37712
									1.48903
									1.75702
									2.24306
									3.01525
									2.56949
									3.1311
									1.75788
									3.07656
									1.95717
									2.41711
									2.06281
									3.24184
									1.1884
									2.34199
									1.67672
									2.17441
									3.42694
									2.77526
									2.82985
									0.482435
									2.78513
									3.51854
									1.80488
									3.03703
									2.59096
									3.35417
									2.90728
									3.7866
									1.81762
									1.83026
									2.61424
									2.91399
									2.68437
									0.137635
									3.5008
									3.54473
									3.77821
									3.5509
									2.44042
									3.26318
									1.97563
									2.86967
									2.48336
									3.49697
									3.7939
									2.79764
									2.24458
									1.87263
									2.88714
									2.99675
									2.25429
									3.02006
									2.42841
									3.16912
									3.2211
									3.04614
									2.74502
									0.463622
									1.7685
									2.55483
									2.32222
									0.812621
									1.92448
									2.66517
									3.07998
									3.00324
									2.77968
									1.37851
									2.94953
									3.83693
									1.8168
									2.93998
									2.89724
									3.123
									1.92752
									2.78973
									1.49825
									2.6487
									2.41819
									1.58592
									1.16672
									2.03492
									2.98204
									2.72748
									2.16157
									1.74502
									2.34823
									2.28007
									2.35783
									1.37351
									1.2969
									2.80199
									3.73877
									3.79597
									2.58736
									2.9182
									3.17217
									3.21677
									3.35233
									1.72465
									2.52632
									1.51147
									3.0165
									2.63761
									3.3529
									2.0036
									3.0213
									2.10969
									2.05485
									2.3051
									2.86414
									3.15737
									2.92448
									2.17025
									2.29101
									3.33543
									2.88401
									3.30349
									3.59694
									0.650673
									3.34554
									2.20069
									3.09997
									2.17792
									3.55582
									2.9443
									3.26679
									2.63134
									3.02945
									2.42787
									3.07142
									3.55827
									3.15121
									2.93584
									2.63668
									2.68415
									3.62877
									2.10434
									0.356595
									1.2857
									3.09677
									2.78073
									3.05085
									2.15478
									3.26873
									3.44917
									2.69577
									3.27292
									3.29337
									1.66084
									3.22897
									2.08338
									2.97966
									2.90304
									2.69688
									2.95364
									2.08372
									3.84699
									2.5213
									1.39944
									1.67401
									2.33743
									0.767655
									2.9607
									2.41359
									3.7845
									3.55704
									2.98932
									0.740021
									2.41468
									2.88088
									1.86987
									3.09102
									3.55336
									3.11886
									3.40681
									3.30816
									1.59407
									2.55508
									3.05554
									2.40844
									2.37407
									2.30801
									3.29087
									1.81065
									2.00863
									2.66993
									3.46728
									2.97874
									3.45325
									2.614
									0.994652
									3.42881
									2.63413
									2.5986
									2.14307
									2.99005
									2.10702
									3.53232
									3.13898
									2.31528
									2.86849
									1.9953
									2.71304
									2.93093
									2.8502
									2.301
									3.10081
									2.5213
									3.39835
									3.44943
									2.87892
									2.68975
									1.64293
									0.675003
									3.21054
									2.04229
									2.63946
									2.49313
									2.42653
									1.338
									2.00216
									2.22682
									2.95047
									1.42277
									2.97141
									2.1551
									1.48646

## Sheet: Figure 6B
	Normal (GTex) n=128	Tumor (TCGA-ACC) n=77
	4.03914	0.01435
	2.37291	0.32194
	1.60879	1.59457
	3.37714	0.15056
	2.98368	1.95237
	4.10348	0.11103
	1.41146	1.79074
	2.13754	0.29866
	2.30159	0
	3.67804	0.09761
	2.90112	1.10434
	2.26606	0.80736
	2.94671	0.80736
	3.10435	0.01435
	2.62523	0
	2.59212	1.98551
	3.706	2.25395
	2.46988	0.856
	2.43024	2.16031
	2.73556	0.23879
	3.843	0.1375
	3.00537	2.38406
	2.75488	0.01435
	2.3477	0.01435
	2.77398	2.45154
	2.3363	0.33342
	3.93738	0.82375
	3.6264	0.01435
	3.95328	0.67806
	1.94111	1.57044
	3.09428	0.01435
	2.92219	1.04263
	3.37714	2.95977
	1.02858	0.17632
	3.10939	0.90302
	2.75275	0.36737
	2.98368	0.84801
	4.3688	0.55582
	3.93925	2.37849
	4.06433	0.97817
	3.22189	0.08407
	3.44365	0.02857
	2.65076	0.04264
	1.07726	0.07039
	2.28392	1.76975
	3.03036	0.67806
	3.08068	0.08407
	2.20477	0.44361
	3.00896	0.07039
	1.6781	0.7137
	3.37434	0.856
	2.21104	1.95608
	2.62993	2.6182
	2.51346	1.18905
	3.96161	0.02857
	2.80324	0.41143
	2.75914	0
	2.5185	0.46468
	0.275	2.55094
	3.20003	3.26903
	2.88753	2.33911
	3.843	0.11103
	2.96535	1.62295
	2.26907	0.01435
	0.94862	2.37574
	4.90396	0.02857
	3.74205	0
	2.01432	0.01435
	0	0.11103
	3.29865	4.03999
	2.50843	0.08407
	4.07552	0
	2.65076	2.07724
	2.44623	0.44361
	2.6848	0.09761
	2.8258	0.01435
	2.66902	0.275
	0.49569
	2.85403
	1.74418
	2.70485
	2.67358
	2.43562
	2.87188
	2.94488
	2.08403
	2.54348
	2.46988
	2.96718
	2.10771
	3.81966
	3.34771
	3.27056
	2.68261
	3.56319
	3.82682
	2.3477
	3.36594
	2.87378
	3.8768
	3.88361
	1.29275
	1.95237
	2.85403
	3.45946
	2.70485
	3.71477
	1.80321
	3.26303
	2.19851
	1.36735
	3.32914
	3.80322
	2.15705
	3.56072
	3.49441
	3.04265
	1.65535
	2.61117
	3.69935
	2.82168
	3.53109
	1.76551
	3.01615
	1.18905
	0.91839
	0.3785
	2.68928

## Sheet: Figure 6C
Time (Days)	High expression	Low expression
1201	0
2740	0
822	0
549	0
2023	0
3465	0
756	0
950	0
1497	0
3289	0
3688	0
464	0
1750	1
1858	0
2331	0
1317	0
1613	1
2015	0
552	1
4628	0
383	0
907	0
3038	0
1493	0
922	1
871	0
1171	0
719	0
967	0
1414	0
4673	0
1857	0
2056	0
2385	1
2342	0
1103	0
2091	0
579		1
490		1
1293		0
541		1
861		0
1204		1
1355		1
551		1
1197		1
2202		0
1589		0
125		1
3623		0
749		0
365		1
662		1
159		1
1029		0
1082		0
344		1
2405		1
498		1
2076		0
207		1
1105		1
383		1
1677		1
2895		0
885		0
1096		0
490		1
2703		0
616		0
1194		0
562		1
1364		0
391		1
1352		0
2105		1
3878		0

## Sheet: Figure 6D
	Normal (GTex) n=128	Tumor (TCGA-ACC) n=77
	4.34131	3.88463
	3.93542	1.78243
	3.24029	3.25998
	5.18945	6.12786
	4.7756	2.11102
	4.32772	3.30162
	4.93877	5.31253
	3.52981	2.2203
	4.60287	3.79904
	5.53727	2.13754
	4.5699	2.59212
	4.87478	4.22955
	4.16667	1.73549
	4.51668	5.47087
	3.85799	0.65078
	4.98456	3.59334
	4.64153	1.51603
	4.32192	2.65303
	4.37013	3.5729
	4.66736	4.4189
	5.0144	2.80118
	4.32696	4.19454
	4.34626	3.36034
	3.34627	1.64614
	3.80944	2.78868
	4.49249	1.64614
	5.24677	2.1635
	4.97178	1.35616
	4.23192	2.43293
	3.09428	2.25095
	4.7442	3.09428
	4.35824	2.78663
	5.05793	4.84948
	2.9542	2.83999
	4.26754	2.1144
	4.31547	4.26233
	4.68649	6.00876
	5.11811	1.48029
	5.52015	5.36559
	5.4957	4.8545
	4.63049	4.272
	4.61706	3.76557
	4.02328	4.36461
	4.35615	2.91646
	4.61476	2.46988
	4.33485	2.69156
	5.17953	3.07557
	3.72031	2.6622
	5.05657	2.29864
	5.25212	4.76077
	6.04371	0.91073
	4.19615	2.36179
	4.15383	1.90304
	4.00901	3.97359
	5.29391	4.17394
	4.48284	3.0687
	4.95329	4.85054
	3.43293	3.68929
	3.75806	4.47052
	4.61764	4.85199
	4.74305	4.37508
	4.89575	2.11771
	4.25323	3.62879
	3.9088	3.27056
	4.19057	3.00178
	5.60766	5.04833
	4.78293	3.76445
	4.75383	5.16708
	0	4.4067
	5.09383	4.52672
	4.65075	3.22189
	4.79131	2.55335
	4.35967	3.25398
	4.43826	2.07724
	4.2555	1.62295
	4.67524	3.38401
	4.59213	1.32769
	4.50779
	4.87874
	3.8258
	3.63347
	4.83288
	4.57833
	4.58733
	4.5472
	4.76183
	5.17272
	4.2979
	4.27503
	4.03032
	4.73121
	4.99095
	4.23116
	4.49249
	4.94061
	5.09044
	4.39641
	5.24755
	4.57287
	4.73227
	4.37508
	3.51101
	3.89144
	4.39098
	4.6496
	5.10267
	4.78659
	4.59577
	4.49316
	4.24489
	3.2824
	4.84195
	4.68255
	3.37299
	5.36773
	4.51094
	5.9444
	3.88557
	4.62003
	5.19178
	4.11441
	5.07384
	4.07129
	4.90444
	3.81557
	4.79594
	2.76127
	4.74305

## Sheet: Figure 6E
Time (Days)	High expression	Low expression
579	1
1201	0
1293	0
541	1
822	0
1204	1
2023	0
551	1
756	0
3289	0
2202	0
3688	0
125	1
1613	1
1029	0
552	1
383	0
907	0
1082	0
344	1
2405	1
922	1
967	0
383	1
2895	0
1414	0
4673	0
1857	0
2056	0
2385	1
1096	0
490	1
2703	0
616	0
1194	0
1103	0
2091	0
2105	1
490		1
2740		0
861		0
1355		1
549		0
3465		0
1197		1
950		0
1497		0
1589		0
3623		0
464		0
749		0
1750		1
365		1
1858		0
2331		0
662		1
1317		0
159		1
2015		0
4628		0
498		1
3038		0
1493		0
2076		0
207		1
1105		1
871		0
1171		0
719		0
1677		1
885		0
2342		0
562		1
1364		0
391		1
1352		0
3878		0
