# Supplementary figures and images for: The RAB27A effector SYTL5 regulates mitophagy and mitochondrial metabolism
Source: eLife journal article supplement (doi:10.7554/elife.105541), 2025-02-17

Figure 2F

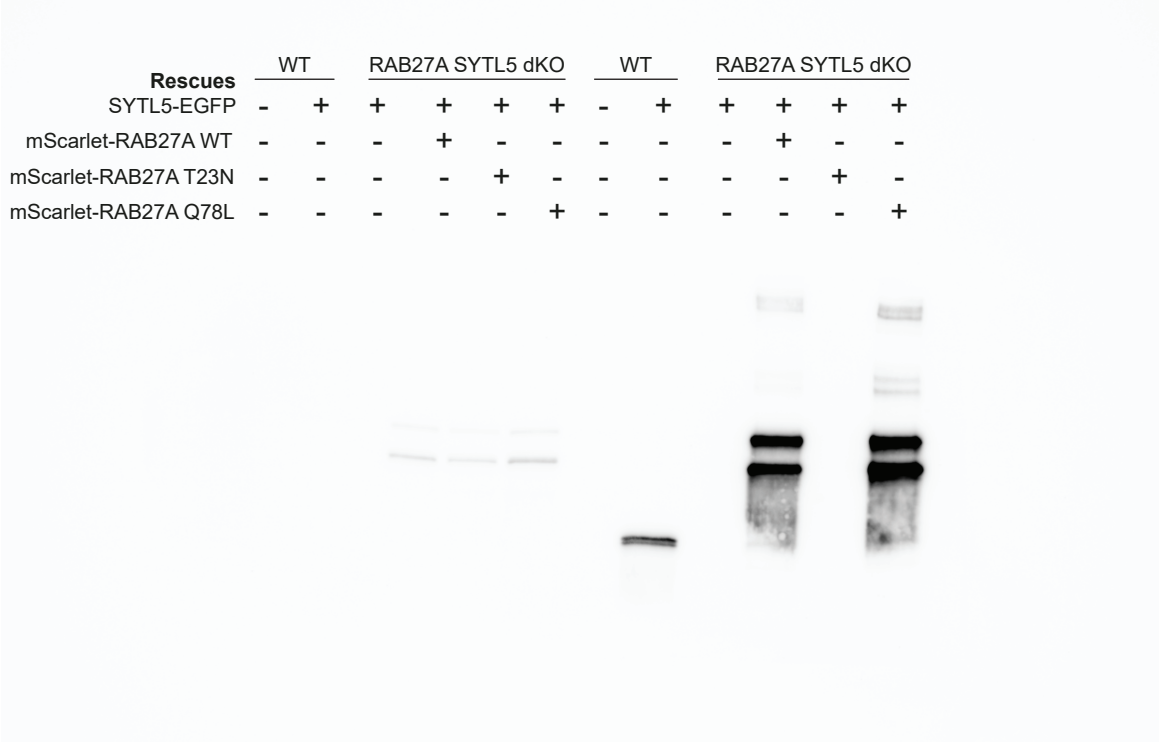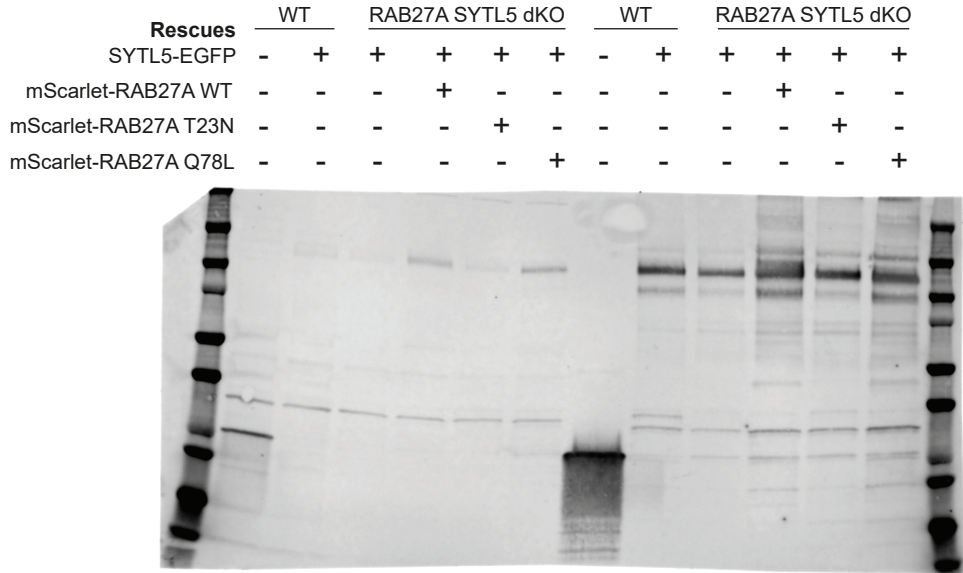

Supplement: fig2-data3 [file Figure 2F-Source Data 3.pdf › Figure 2-Source Data 3/Figure 2F-Source Data 3.pdf]

Figure 2 – figure supplement 1B

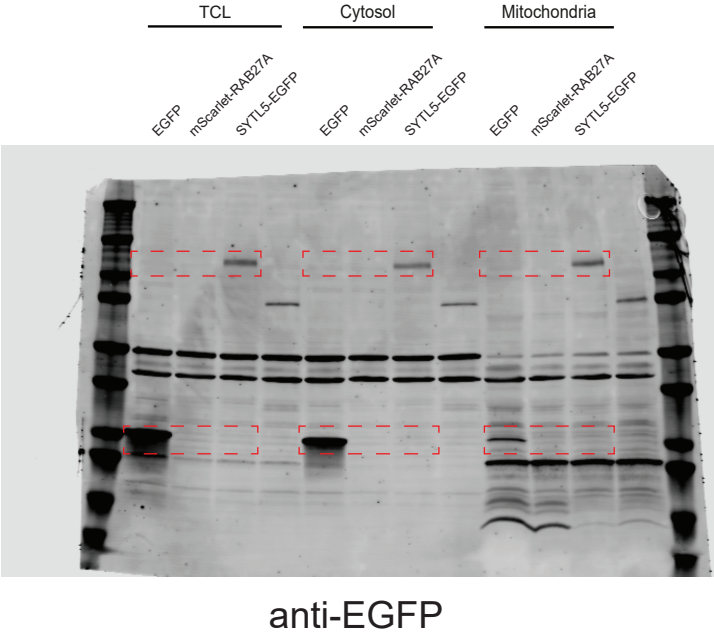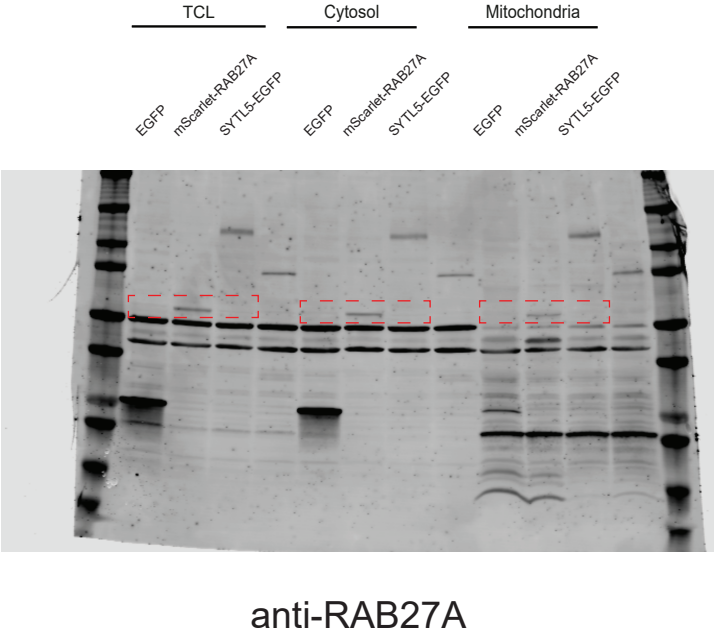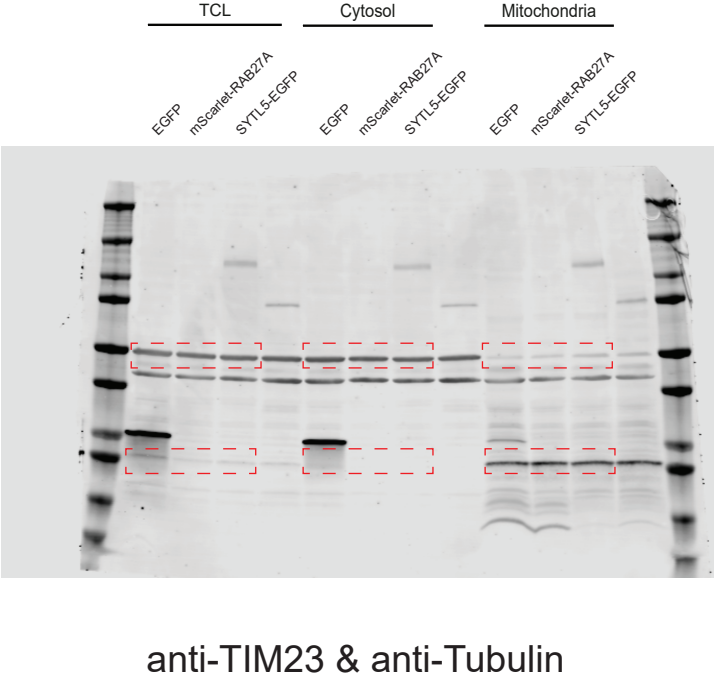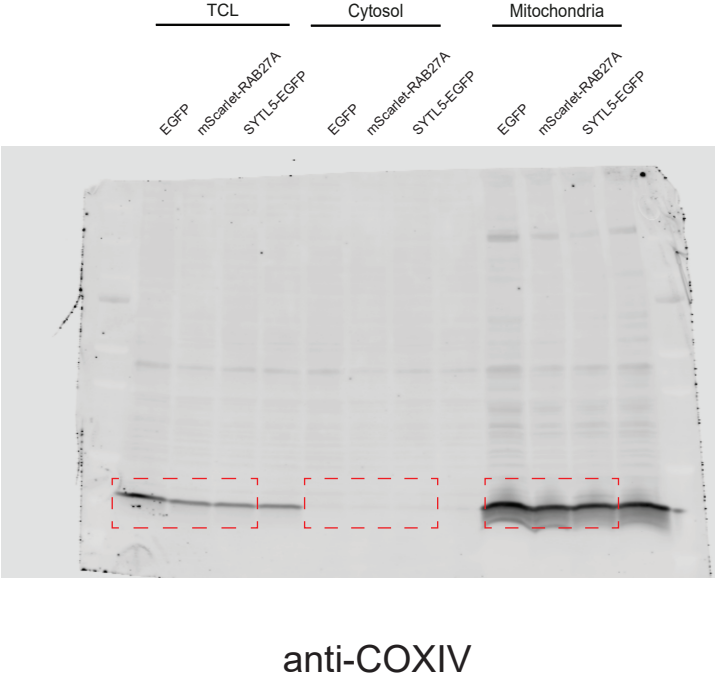

Supplement: fig2-figsupp1-data3 [file Figure 2 – figure supplement 1B-Source Data 5.pdf › Figure 2 – figure supplement 1-Source Data 3/Figure 2 – figure supplement 1B-Source Data 5.pdf]

Figure 2 – figure supplement 2B

anti-RAB27A

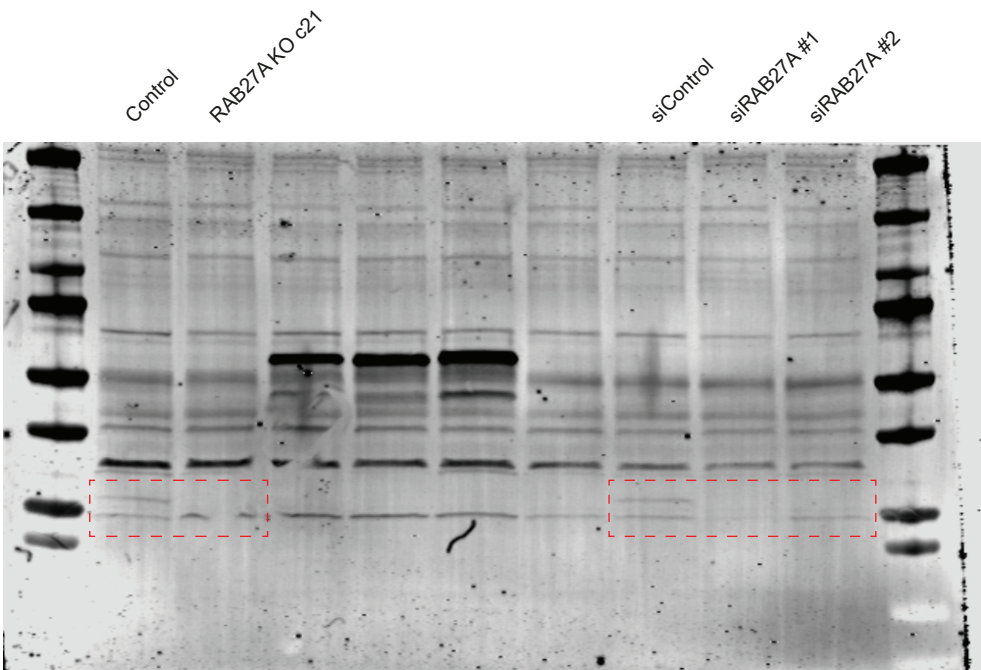

anti-Actin

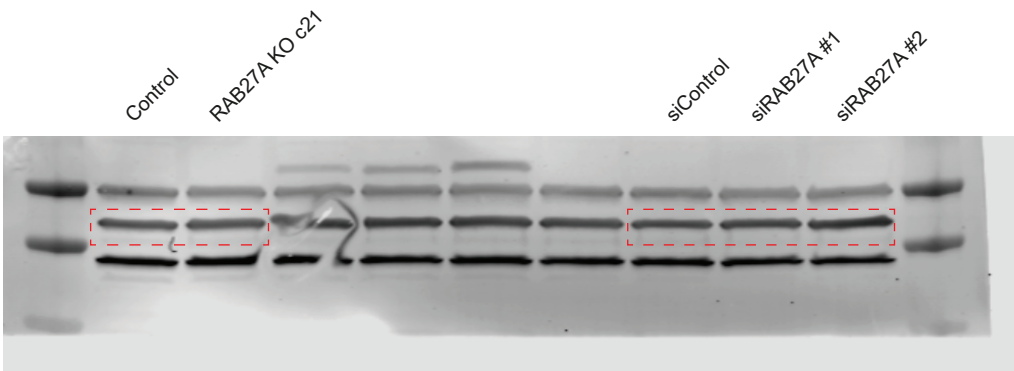

Figure 2 – figure supplement 2D

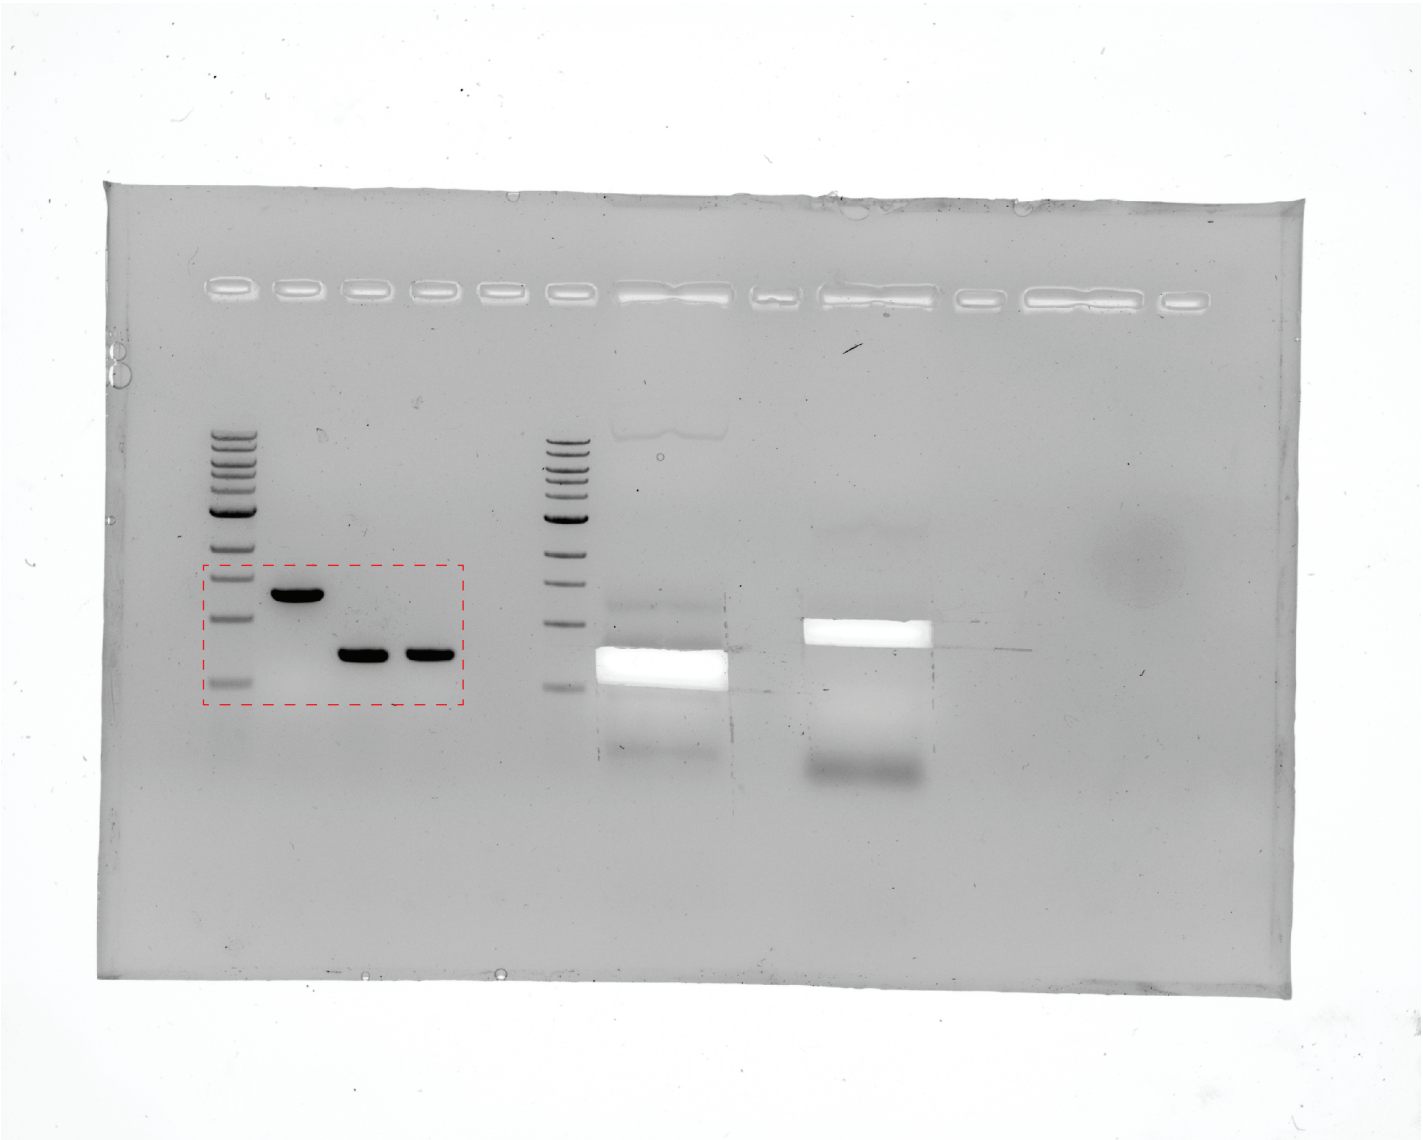

Supplement: fig2-figsupp2-data2 [file Figure 2 – figure supplement 2B-Source Data 3.pdf › Figure 2 – figure supplement 2-Source Data 2/Figure 2 – figure supplement 2B-Source Data 3.pdf]

Figure 4C

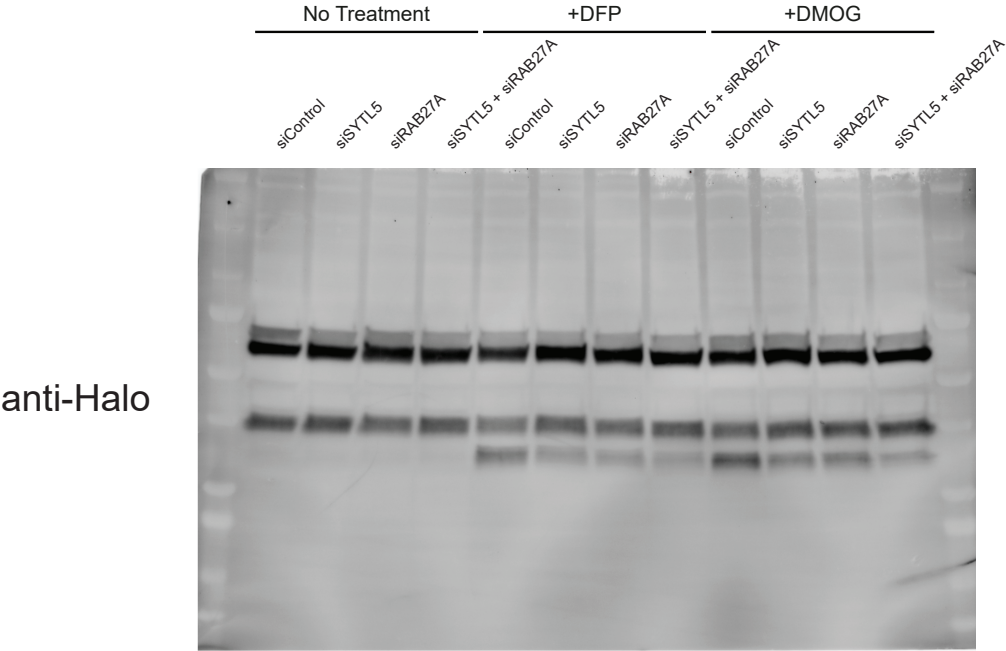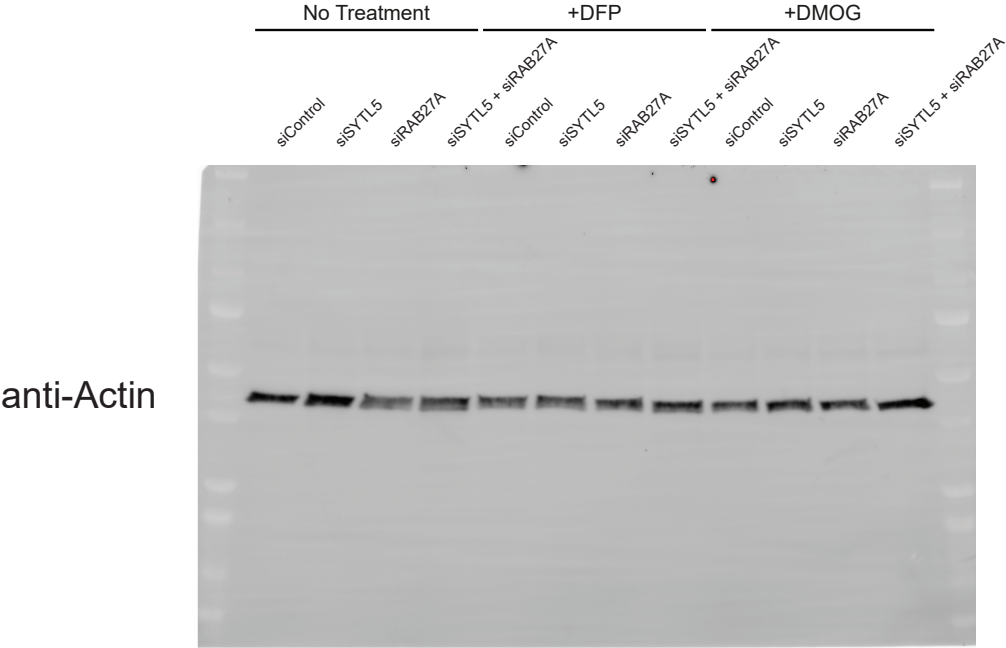

Supplement: fig4-data4 [file Figure 4C-Source Data 3.pdf › Figure 4-Source Data 3/Figure 4C-Source Data 3.pdf]

Figure 4 – figure supplement 2F

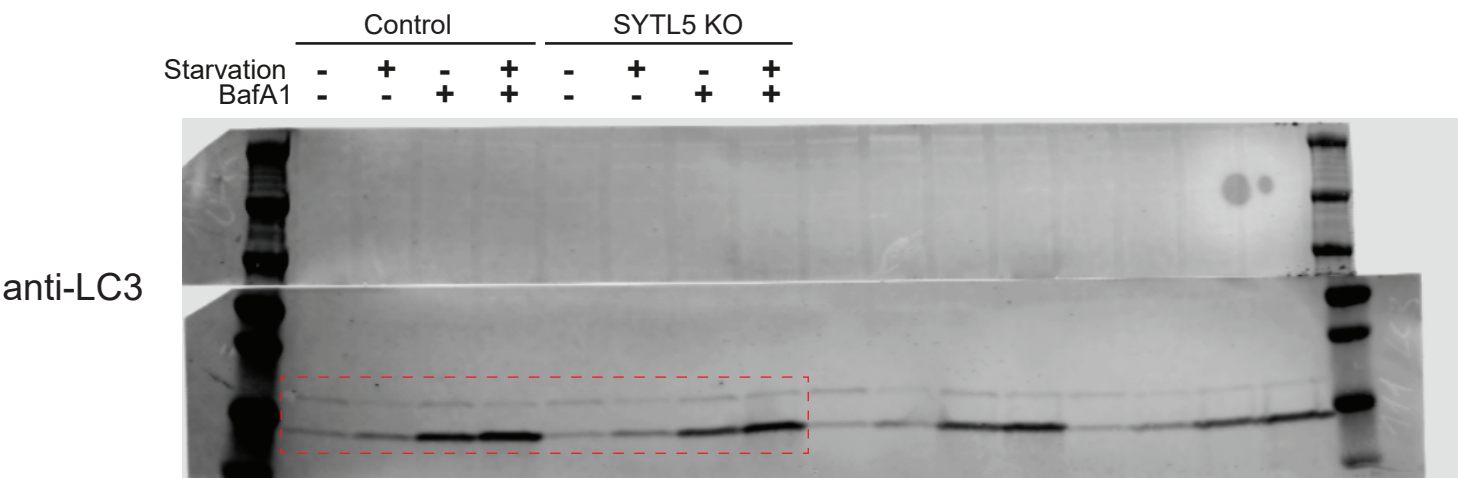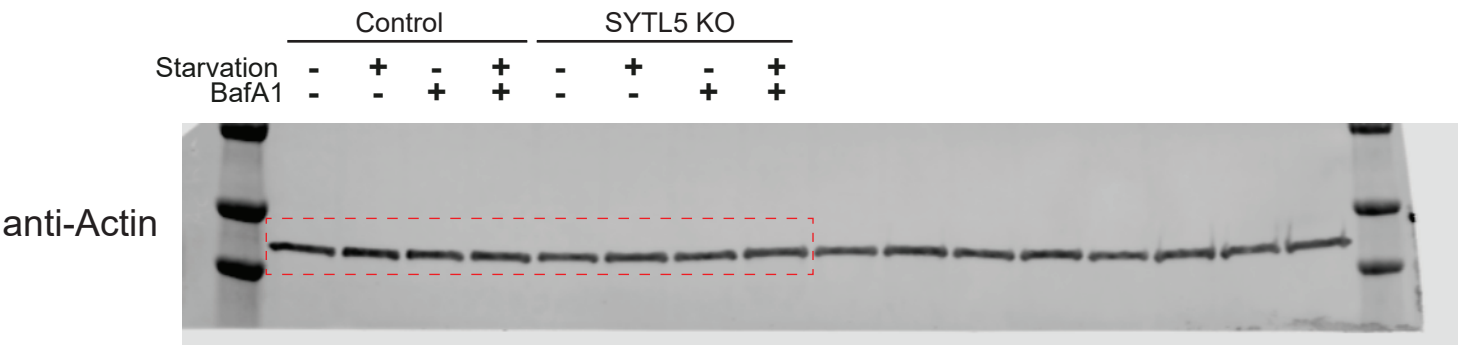

Supplement: fig4-figsupp2-data2 [file Figure 4 – figure supplement 2F-Source Data 3.pdf › Figure 4 – figure supplement 2-Source Data 2/Figure 4 – figure supplement 2F-Source Data 3.pdf]

Figure 5E

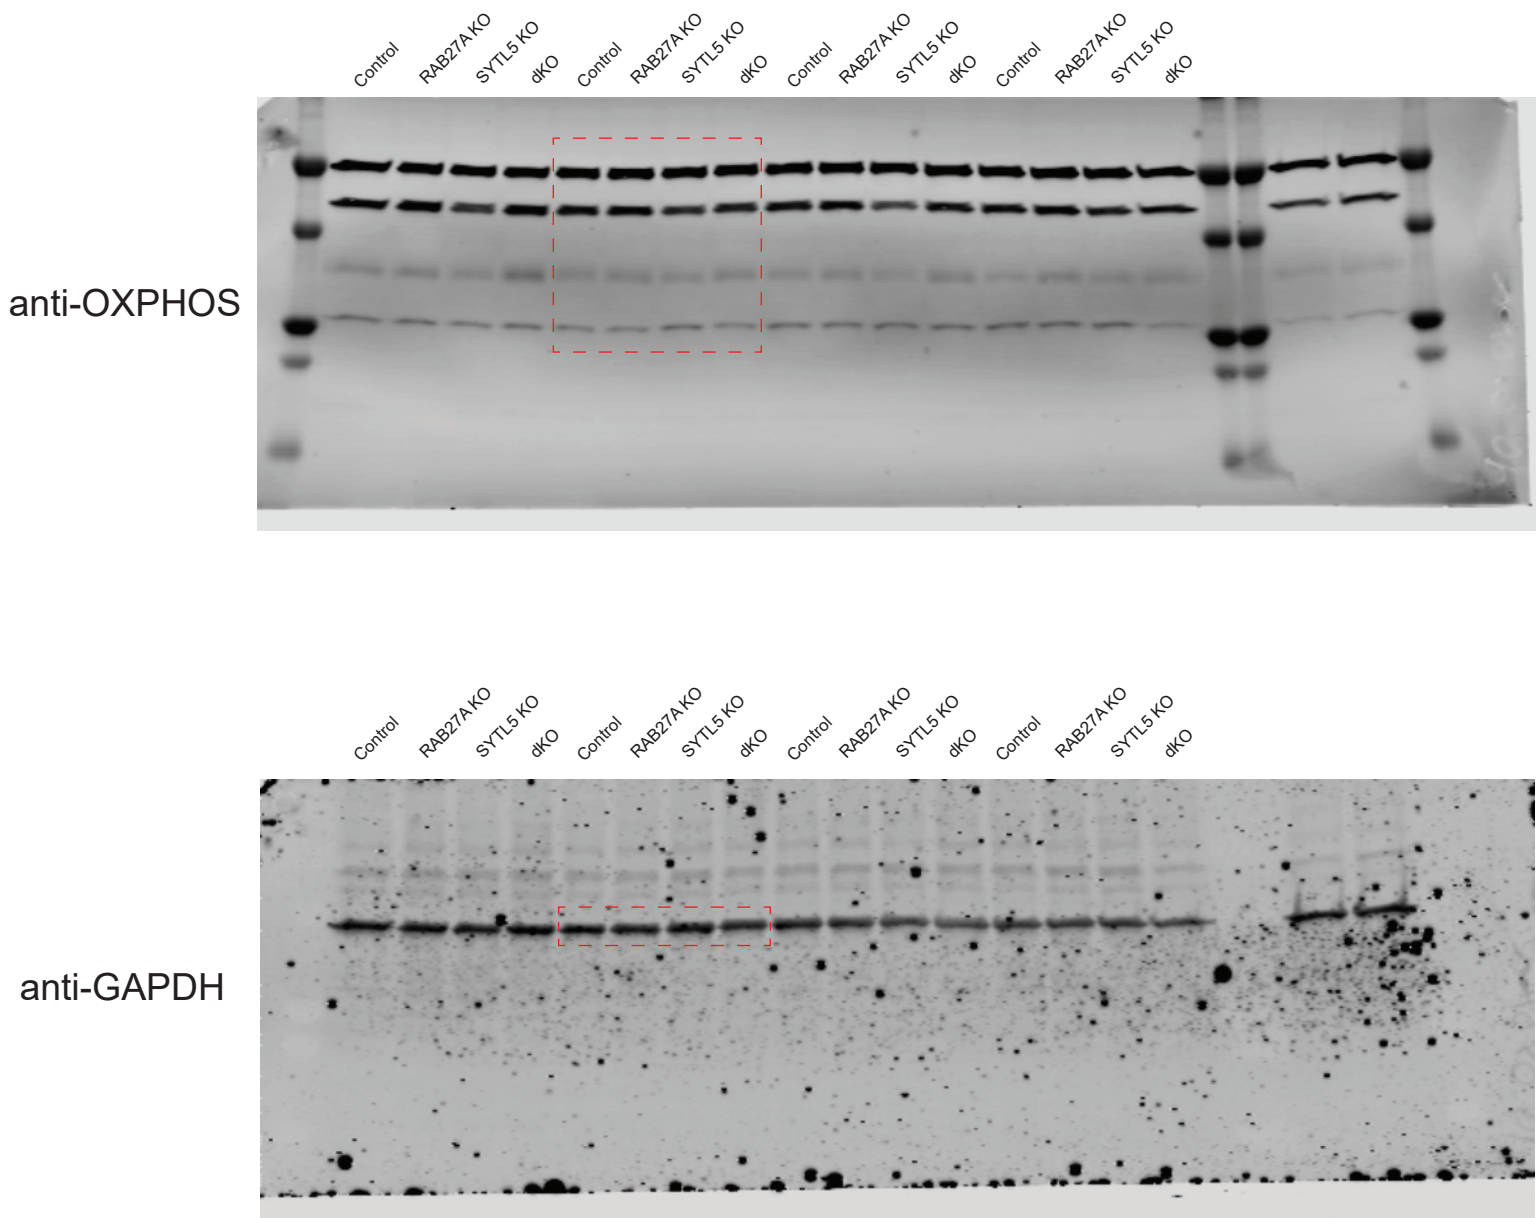

Supplement: fig5-data2 [file Figure 5E-Source Data 3.pdf › Figure 5-Source Data 2/Figure 5E-Source Data 3.pdf]
